# Supplementary material
Source: Royal Society of Chemistry journal article supplement (doi:10.1039/d6tc00859c)
Supplement: d6tc00859c3.pdf [file d6tc00859c3.pdf]

## *Supporting Information*

# **Molecular Dual-Functionalization Unlocks Room-Temperature Phosphorescence of Graphitic Carbon Nitride for Environmentally Robust Encryption**

Jingyang Xu<sup>1</sup>, Qikun Sun<sup>2</sup>, Mingming Zhang<sup>1,3</sup>, Xinyi Wang<sup>1</sup>, Yingqin Xu<sup>1</sup>, Kang Liu<sup>1</sup>,

Jixiang Xu<sup>1</sup>, Fangxu Dai<sup>1,4,\*</sup>, Lei Wang<sup>1</sup>, Jun Xing<sup>1,\*</sup>

<sup>1</sup>State Key Laboratory of Advanced Optical Polymer and Manufacturing Technology, College of Chemistry and Molecular Engineering, Qingdao University of Science & Technology, Qingdao 266042, China.

<sup>2</sup>School of Polymer Science and Engineering, Qingdao University of Science & Technology, Qingdao, 266042, China.

<sup>3</sup>College of Sino-German Science and Technology, Qingdao University of Science & Technology, Qingdao 266042, China.

<sup>4</sup>School of Pharmacy, Jining Medical University, Rizhao 276800, China.

\*Correspondence: daifangxu@mail.jnmc.edu.cn (F.D.), xingjun@qust.edu.cn (J.X.)

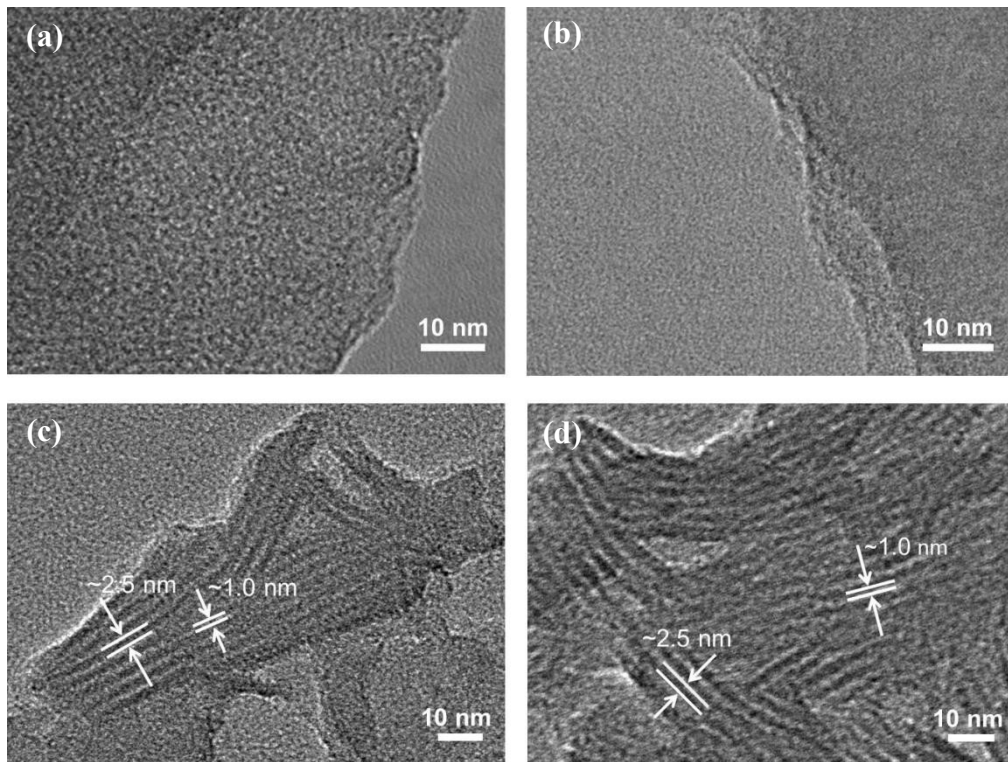

**Figure S1.** High-resolution TEM images of layered structures of the PhCN (a) and Np-PhCN (b).

High-resolution TEM images of banded structures of the PhCN (c) and Np-PhCN (d).

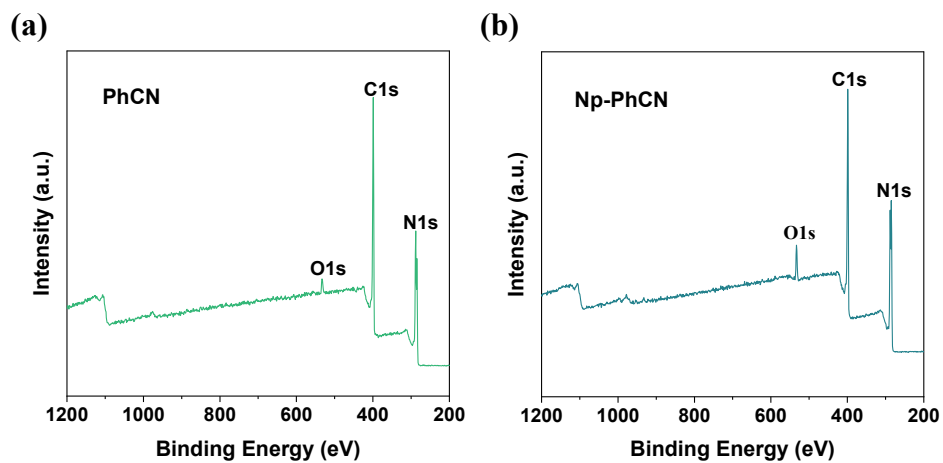

**Figure S2.** XPS spectra of the PhCN (a) and Np-PhCN (b) samples. The presence of the element O is mainly due to the material being exposed to the air and absorbing CO<sub>2</sub>.

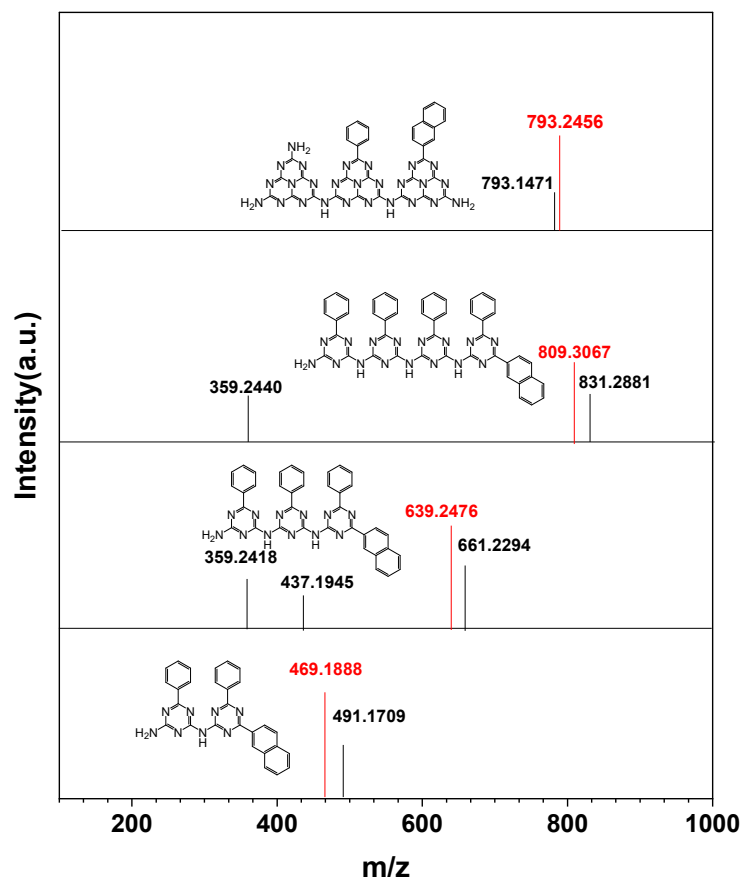

**Figure S3.** LC-MS data for the washing solution of the synthesized sample Np-PhCN.

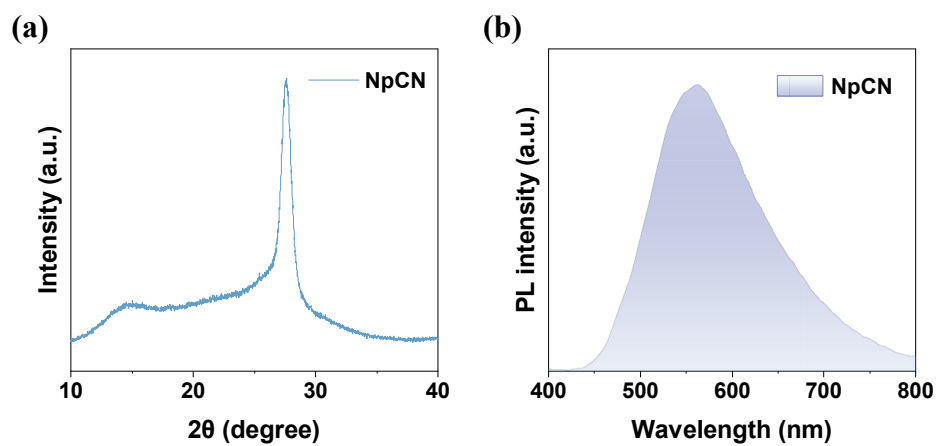

**Figure S4.** XRD patterns and emission spectra of NpCN. The XRD pattern of NpCN has the diffraction peak at  $27.6^\circ$ , which corresponds to the (002) graphite-like plane of conjugated aromatic systems. The NpCN exhibits weak fluorescence emission and an absence of phosphorescence.

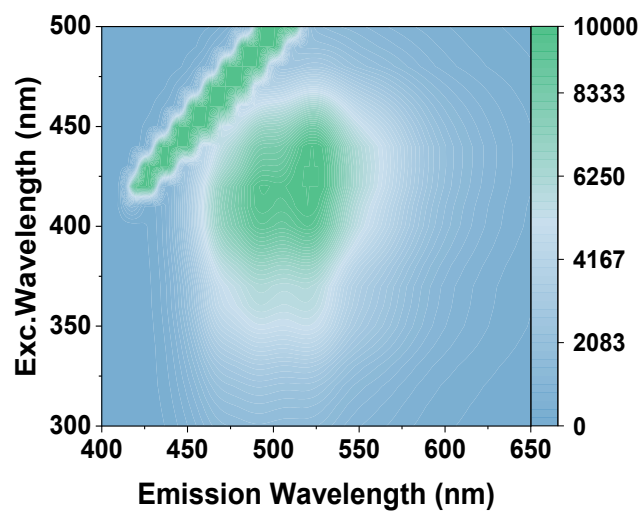

**Figure S5.** The fluorescence excitation spectrum of PhCN.

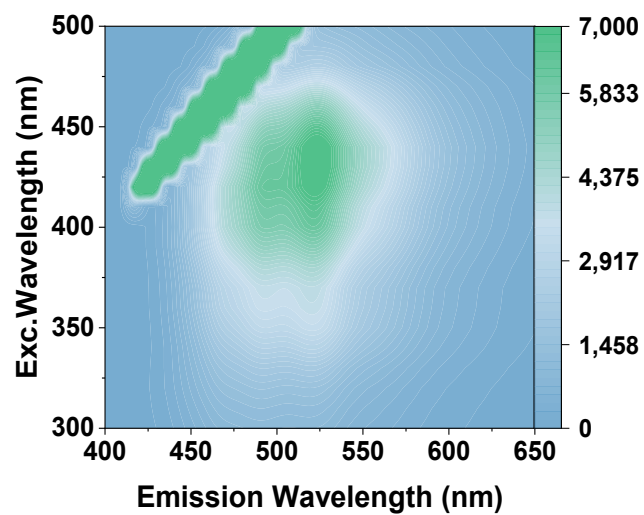

**Figure S6.** The fluorescence excitation spectrum of Np-PhCN.

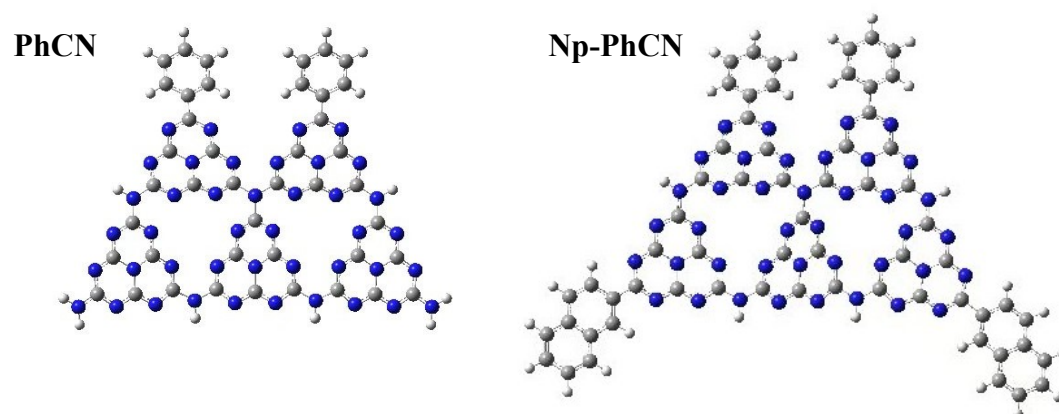

**Figure S7.** Theoretically optimized structure of PhCN and Np-PhCN.

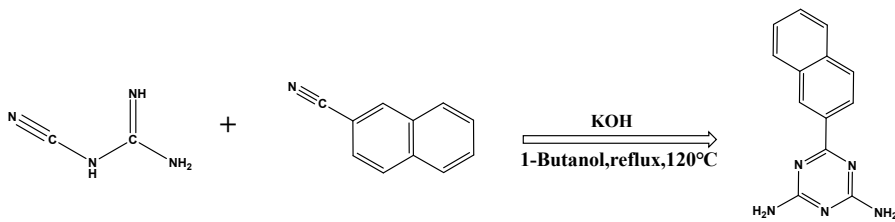

**Figure S8.** The synthesis mechanism of 2,4-diamino-6-naphthyl-1,3,5-triazine.

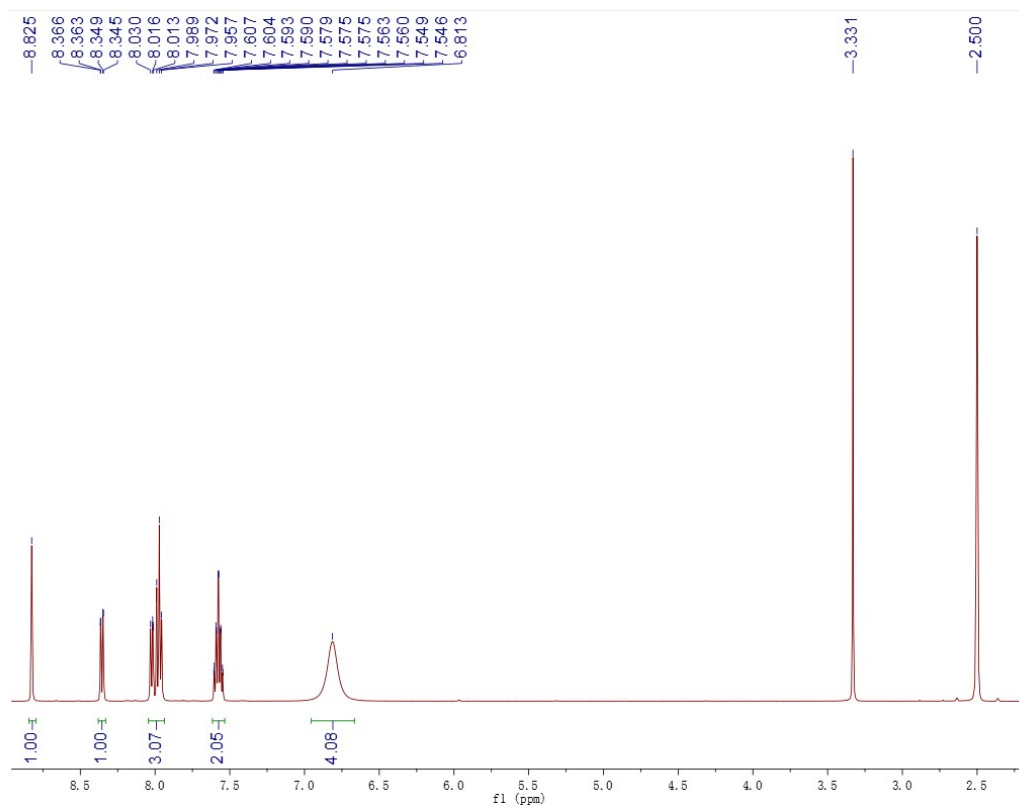

**Figure S9.**  $^1\text{H}$  NMR of the synthesized 2,4-diamino-6-naphthyl-1,3,5-triazine. The  $^1\text{H}$  NMR spectrum shows that the peak at 6-9 ppm is the characteristic peak of 2,4-diamino-6-naphthyl-1,3,5-triazine. The peaks at 2.500 and 3.331 ppm are derived from absorbed water in sample and the solvent DMSO.

**Table S1.** The fitting data of C 1s XPS spectra of PhCN and Np-PhCN.

| <b>Samples</b> | <b>Peak fit</b> | <b>Peak BE (eV)</b> | <b>FWHM (eV)</b> | <b>Content (%)</b> |
|----------------|-----------------|---------------------|------------------|--------------------|
| PhCN           | C-C/C=C         | 284.7               | 1.1              | 33.4               |
|                | C-Ph            | 286.1               | 2.0              | 15.5               |
|                | N-C=N           | 288.3               | 1.4              | 51.1               |
| Np-PhCN        | C-C/C=C         | 284.8               | 1.2              | 45.1               |
|                | C-Ph/C-Np       | 286.3               | 1.8              | 12.2               |
|                | N-C=N           | 288.2               | 1.1              | 42.5               |

**Table S2.** The fitting data of N 1s XPS spectra of PhCN and Np-PhCN.

| Samples | Peak fit          | Peak BE (eV) | FWHM (eV) | Content (%) |
|---------|-------------------|--------------|-----------|-------------|
| PhCN    | N <sub>2C</sub>   | 398.8        | 1.2       | 54.9        |
|         | NH <sub>x</sub>   | 400.0        | 1.3       | 25.4        |
|         | N <sub>3C</sub>   | 401.1        | 1.3       | 15.8        |
|         | $\pi$ -excitation | 405.0        | 3.1       | 3.8         |
| Np-PhCN | N <sub>2C</sub>   | 398.7        | 1.2       | 68.7        |
|         | NH <sub>x</sub>   | 399.7        | 1.1       | 15.8        |
|         | N <sub>3C</sub>   | 401.1        | 1.1       | 11.4        |
|         | $\pi$ -excitation | 404.4        | 2.0       | 3.8         |

**Table S3.** XPS elemental content analysis of PhCN.

| <b>Elements</b> | <b>FWHM (eV)</b> | <b>Atomic content (%)</b> |
|-----------------|------------------|---------------------------|
| C 1s            | 5.71             | 59.42                     |
| N 1s            | 2.85             | 38.93                     |
| O 1s            | 3.75             | 1.65                      |

**Table S4.** XPS elemental content analysis of Np-PhCN.

| <b>Elements</b> | <b>FWHM (eV)</b> | <b>Atomic content (%)</b> |
|-----------------|------------------|---------------------------|
| C 1s            | 5.55             | 60.76                     |
| N 1s            | 2.80             | 33.58                     |
| O 1s            | 3.28             | 3.82                      |

**Table S5.** The fluorescence peak locations and PLQYs of g-CN.

| <b>Sample</b> | <b>Peak center (nm)</b> | <b>PLQY (%)</b> | <b>PQY(%)</b> |
|---------------|-------------------------|-----------------|---------------|
| p-CN          | 465                     | 9               | /             |
| PhCN          | 520                     | 41              | /             |
| NpCN          | 560                     | 3               | /             |
| Np-PhCN       | 520                     | 37              | 4.4           |

**Table S6.** The fitting data of temperature-dependent phosphorescence lifetime for Np-PhCN.

| <b>Temperature</b> | <b><math>\tau_1</math> (ms)</b> | <b><math>\tau_2</math> (ms)</b> | <b><math>\tau_3</math> (ms)</b> |
|--------------------|---------------------------------|---------------------------------|---------------------------------|
| 77 K               | 7.7                             | 87                              | 1130                            |
| 160 K              | 5.8                             | 53                              | 770                             |
| 230 K              | 4.1                             | 28                              | 284                             |
| 300 K              | 3.4                             | 16                              | 85                              |
| 370 K              | 3.1                             | 12                              | 99                              |

**Table S7.** Cartesian coordinate system of PhCN.

| Element | X        | Y        | Z        |
|---------|----------|----------|----------|
| N       | 5.94337  | 2.4938   | 0.02101  |
| C       | 5.76425  | 1.24521  | -0.4544  |
| N       | 4.59244  | 0.67611  | -0.78683 |
| C       | 3.47586  | 1.28552  | -0.39591 |
| N       | 3.57813  | 2.54428  | 0.25492  |
| C       | 4.84648  | 3.17697  | 0.37586  |
| N       | 2.26029  | 0.75537  | -0.57376 |
| C       | 1.22948  | 1.35376  | 0.03515  |
| N       | 1.24603  | 2.52153  | 0.69398  |
| C       | 2.41015  | 3.18035  | 0.7569   |
| N       | 2.52516  | 4.40107  | 1.28424  |
| C       | 3.74562  | 4.98468  | 1.30498  |
| N       | 4.89594  | 4.4128   | 0.87854  |
| C       | 3.83005  | 6.34728  | 1.84251  |
| N       | 6.91558  | 0.49245  | -0.62395 |
| C       | 5.07026  | 7.00262  | 1.90194  |
| C       | 5.14557  | 8.29642  | 2.40937  |
| C       | 3.98794  | 8.94104  | 2.8593   |
| C       | 2.75151  | 8.28855  | 2.80123  |
| C       | 2.66922  | 6.99476  | 2.29472  |
| N       | -1.24594 | 2.52161  | -0.69399 |
| C       | -1.22947 | 1.3538   | -0.03523 |
| N       | -2.26036 | 0.7554   | 0.57357  |
| C       | -3.47589 | 1.28559  | 0.39566  |
| N       | -3.57809 | 2.54439  | -0.25513 |
| C       | -2.41004 | 3.18047  | -0.7569  |
| N       | -4.59254 | 0.67618  | 0.7864   |
| C       | -5.76431 | 1.24533  | 0.45392  |
| N       | -5.94335 | 2.49394  | -0.02146 |
| C       | -4.84642 | 3.1771   | -0.3762  |
| N       | -4.8958  | 4.41297  | -0.87879 |
| C       | -3.74541 | 4.98485  | -1.30504 |
| N       | -2.52496 | 4.40125  | -1.28416 |
| C       | -3.82972 | 6.34755  | -1.84235 |
| N       | -6.91566 | 0.49263  | 0.62338  |
| C       | -2.66882 | 6.99505  | -2.29436 |
| C       | -2.75101 | 8.28894  | -2.80065 |
| C       | -3.98739 | 8.9415   | -2.8587  |
| C       | -5.14509 | 8.29686  | -2.40898 |
| C       | -5.06989 | 7.00297  | -1.90176 |
| N       | 2.16402  | -3.37294 | 0.93911  |

---

|   |           |          |          |
|---|-----------|----------|----------|
| C | 2.20691   | -4.67501 | 0.61678  |
| N | 1.15204   | -5.45101 | 0.26321  |
| C | -0.00007  | -4.82401 | 0.00022  |
| N | -0.00005  | -3.39716 | 0.00016  |
| C | 1.08598   | -2.68839 | 0.5676   |
| N | -1.15217  | -5.45101 | -0.26274 |
| C | -2.20704  | -4.67501 | -0.61639 |
| N | -2.1641   | -3.37299 | -0.93887 |
| C | -1.08605  | -2.68841 | -0.5674  |
| N | -0.99382  | -1.35662 | -0.66972 |
| C | -0.00002  | -0.75942 | 0.00004  |
| N | 0.99378   | -1.35657 | 0.66981  |
| N | 3.43263   | -5.31565 | 0.58221  |
| N | -3.43275  | -5.31564 | -0.58184 |
| N | -0.00002  | 0.65885  | -0.00002 |
| C | -4.66746  | -4.70875 | -0.40163 |
| N | -5.6601   | -5.52826 | 0.01326  |
| C | -6.81441  | -4.95215 | 0.38788  |
| N | -6.89809  | -3.52529 | 0.39231  |
| C | -5.82672  | -2.76399 | -0.13045 |
| N | -4.74496  | -3.38978 | -0.58059 |
| N | -7.87543  | -5.64856 | 0.7807   |
| C | -8.97048  | -4.95058 | 1.18416  |
| N | -9.09706  | -3.59687 | 1.26909  |
| C | -8.06178  | -2.86188 | 0.88432  |
| N | -8.05187  | -1.51689 | 0.96031  |
| C | -6.95932  | -0.88432 | 0.49595  |
| N | -5.91012  | -1.44147 | -0.12629 |
| N | -10.03822 | -5.67174 | 1.55036  |
| C | 4.66729   | -4.70878 | 0.40173  |
| N | 4.74481   | -3.38979 | 0.58047  |
| C | 5.82655   | -2.76406 | 0.13022  |
| N | 6.8979    | -3.52546 | -0.39249 |
| C | 6.81423   | -4.95231 | -0.38776 |
| N | 5.65992   | -5.52836 | -0.01306 |
| C | 8.06161   | -2.86213 | -0.88454 |
| N | 9.09685   | -3.5972  | -1.26926 |
| C | 8.97025   | -4.95089 | -1.18413 |
| N | 7.87524   | -5.64878 | -0.78048 |
| N | 5.90996   | -1.44155 | 0.12587  |
| C | 6.95918   | -0.8845  | -0.49641 |
| N | 8.05173   | -1.51717 | -0.96068 |
| N | 10.038    | -5.67211 | -1.55022 |
| H | 5.94729   | 6.47715  | 1.54839  |

---

---

|   |           |          |          |
|---|-----------|----------|----------|
| H | 6.10165   | 8.804    | 2.4567   |
| H | 4.04936   | 9.94858  | 3.25458  |
| H | 1.85695   | 8.79011  | 3.15061  |
| H | 1.7284    | 6.46388  | 2.23649  |
| H | -7.79567  | 0.99083  | 0.73504  |
| H | -1.72804  | 6.4641   | -2.23615 |
| H | -1.85639  | 8.79051  | -3.14988 |
| H | -4.04872  | 9.94911  | -3.25382 |
| H | -6.10114  | 8.80449  | -2.4563  |
| H | -5.94698  | 6.4775   | -1.54836 |
| H | 3.40216   | -6.31674 | 0.39319  |
| H | -3.40231  | -6.31671 | -0.39266 |
| H | -10.87303 | -5.19347 | 1.86704  |
| H | -9.9891   | -6.68274 | 1.51269  |
| H | 9.98891   | -6.6831  | -1.51238 |
| H | 10.87279  | -5.19387 | -1.86701 |
| H | 7.79561   | 0.99059  | -0.73572 |

---

**Table S8.** Cartesian coordinate system of Np-PhCN.

| Element | X        | Y       | Z        |
|---------|----------|---------|----------|
| N       | 5.90957  | 3.8395  | 0.64128  |
| C       | 5.77976  | 2.59443 | 0.14565  |
| N       | 4.64987  | 2.02434 | -0.30609 |
| C       | 3.49796  | 2.63329 | -0.03243 |
| N       | 3.53252  | 3.891   | 0.62693  |
| C       | 4.78111  | 4.52338 | 0.88178  |
| N       | 2.30811  | 2.10301 | -0.33565 |
| C       | 1.2193   | 2.70137 | 0.16326  |
| N       | 1.16714  | 3.86821 | 0.82043  |
| C       | 2.31875  | 4.52718 | 1.00522  |
| N       | 2.37818  | 5.74657 | 1.5435   |
| C       | 3.58982  | 6.32986 | 1.69451  |
| N       | 4.77845  | 5.75676 | 1.38989  |
| C       | 3.61864  | 7.6902  | 2.24115  |
| N       | 6.94453  | 1.84008 | 0.09029  |
| C       | 4.84671  | 8.34372 | 2.43218  |
| C       | 4.86976  | 9.63574 | 2.94881  |
| C       | 3.67193  | 10.2804 | 3.27717  |
| C       | 2.44757  | 9.62991 | 3.08787  |
| C       | 2.41728  | 8.33792 | 2.5714   |
| N       | -1.16711 | 3.86822 | -0.82033 |
| C       | -1.2193  | 2.70139 | -0.16312 |
| N       | -2.30811 | 2.10304 | 0.33578  |
| C       | -3.49795 | 2.63333 | 0.03255  |
| N       | -3.53251 | 3.89102 | -0.62686 |
| C       | -2.31873 | 4.52716 | -1.00517 |
| N       | -4.64986 | 2.02439 | 0.30621  |
| C       | -5.77976 | 2.59447 | -0.14556 |
| N       | -5.90957 | 3.83952 | -0.64125 |
| C       | -4.7811  | 4.52338 | -0.88177 |
| N       | -4.77842 | 5.75673 | -1.38995 |
| C       | -3.58979 | 6.32982 | -1.69457 |
| N       | -2.37815 | 5.74655 | -1.5435  |
| C       | -3.61861 | 7.69013 | -2.24127 |
| N       | -6.94452 | 1.84012 | -0.0902  |
| C       | -4.84668 | 8.34359 | -2.43245 |
| C       | -4.86973 | 9.63559 | -2.94913 |
| C       | -3.6719  | 10.2803 | -3.27737 |
| C       | -2.44752 | 9.62986 | -3.08792 |
| C       | -2.41723 | 8.3379  | -2.5714  |

---

|   |           |          |          |
|---|-----------|----------|----------|
| N | 2.06075   | -2.02593 | 1.14752  |
| C | 2.1338    | -3.32784 | 0.83354  |
| N | 1.12028   | -4.104   | 0.37641  |
| C | -0.00001  | -3.47711 | -0.00006 |
| N | -0.00002  | -2.05013 | 0.00001  |
| C | 1.0245    | -1.34089 | 0.67133  |
| N | -1.1203   | -4.10399 | -0.37657 |
| C | -2.13383  | -3.3278  | -0.83365 |
| N | -2.06077  | -2.02588 | -1.14756 |
| C | -1.02454  | -1.34085 | -0.67128 |
| N | -0.92376  | -0.00949 | -0.76322 |
| C | -0.00001  | 0.58852  | 0.00006  |
| N | 0.92373   | -0.00952 | 0.76329  |
| N | 3.35793   | -3.96925 | 0.92288  |
| N | -3.35797  | -3.96919 | -0.92297 |
| N | 0         | 2.00588  | 0.00007  |
| C | -4.60184  | -3.36168 | -0.87409 |
| N | -5.63538  | -4.17928 | -0.5569  |
| C | -6.8169   | -3.59878 | -0.303   |
| N | -6.90141  | -2.17495 | -0.31343 |
| C | -5.78316  | -1.41507 | -0.73077 |
| N | -4.66306  | -2.04415 | -1.06898 |
| N | -7.92228  | -4.28854 | -0.01405 |
| C | -9.05649  | -3.60724 | 0.27734  |
| N | -9.17436  | -2.25823 | 0.33741  |
| C | -8.10476  | -1.51127 | 0.05643  |
| N | -8.10916  | -0.17003 | 0.12818  |
| C | -6.97318  | 0.46707  | -0.22423 |
| N | -5.86849  | -0.0924  | -0.73831 |
| C | -10.25914 | -4.39454 | 0.56171  |
| C | 4.60181   | -3.36173 | 0.87403  |
| N | 4.66303   | -2.04421 | 1.06894  |
| C | 5.78314   | -1.41512 | 0.73079  |
| N | 6.9014    | -2.175   | 0.31348  |
| C | 6.81688   | -3.59883 | 0.303    |
| N | 5.63534   | -4.17934 | 0.55685  |
| C | 8.10477   | -1.51131 | -0.05628 |
| N | 9.17438   | -2.25826 | -0.33726 |
| C | 9.05649   | -3.60727 | -0.27726 |
| N | 7.92227   | -4.28857 | 0.01406  |
| N | 5.86848   | -0.09246 | 0.73837  |
| C | 6.97318   | 0.46703  | 0.22435  |
| N | 8.10919   | -0.17005 | -0.128   |

---

---

|   |           |          |          |
|---|-----------|----------|----------|
| C | 10.25915  | -4.39457 | -0.56163 |
| C | -10.20546 | -5.7777  | 0.52004  |
| C | -11.3575  | -6.55436 | 0.78819  |
| C | -12.58957 | -5.88703 | 1.10642  |
| C | -12.61024 | -4.46195 | 1.14211  |
| C | -11.48005 | -3.73216 | 0.87827  |
| C | -11.3319  | -7.97756 | 0.75213  |
| C | -12.468   | -8.70668 | 1.01724  |
| C | -13.68361 | -8.04668 | 1.33118  |
| C | -13.74282 | -6.67095 | 1.37476  |
| C | 11.48009  | -3.73218 | -0.87802 |
| C | 12.61029  | -4.46196 | -1.14187 |
| C | 12.58958  | -5.88704 | -1.10636 |
| C | 11.35748  | -6.55438 | -0.7883  |
| C | 10.20543  | -5.77774 | -0.52014 |
| C | 13.74283  | -6.67096 | -1.37471 |
| C | 13.68359  | -8.04669 | -1.33131 |
| C | 12.46794  | -8.7067  | -1.01753 |
| C | 11.33184  | -7.97759 | -0.75242 |
| H | 5.75558   | 7.81837  | 2.17101  |
| H | 5.81608   | 10.14186 | 3.09773  |
| H | 3.69266   | 11.28654 | 3.68007  |
| H | 1.52199   | 10.13169 | 3.34345  |
| H | 1.48702   | 7.80873  | 2.41358  |
| H | -7.8318   | 2.33721  | -0.05599 |
| H | -5.75556  | 7.81821  | -2.17137 |
| H | -5.81605  | 10.14167 | -3.09817 |
| H | -3.69262  | 11.28643 | -3.68031 |
| H | -1.52194  | 10.13168 | -3.34342 |
| H | -1.48697  | 7.80875  | -2.41347 |
| H | 3.34687   | -4.97056 | 0.73186  |
| H | -3.3469   | -4.97053 | -0.73204 |
| H | -9.26427  | -6.25612 | 0.27876  |
| H | -13.54194 | -3.96216 | 1.38378  |
| H | -11.4779  | -2.65113 | 0.90221  |
| H | -10.39843 | -8.47451 | 0.51136  |
| H | -12.44118 | -9.78944 | 0.98795  |
| H | -14.57008 | -8.635   | 1.53769  |
| H | -14.67256 | -6.1667  | 1.61503  |
| H | 11.47797  | -2.65114 | -0.90182 |
| H | 13.54201  | -3.96216 | -1.38341 |
| H | 9.26421   | -6.25616 | -0.27899 |
| H | 14.6726   | -6.16669 | -1.61485 |

---

---

|   |          |          |          |
|---|----------|----------|----------|
| H | 14.57006 | -8.63501 | -1.53783 |
| H | 12.4411  | -9.78946 | -0.98837 |
| H | 10.39834 | -8.47455 | -0.51177 |
| H | 7.83178  | 2.33718  | 0.0561   |

---

**Table S9.** The energy levels of PhCN and Np-PhCN.

| <b>PhCN<br/>energy level</b> | <b>S</b> | <b>T</b> | <b>Np-PhCN<br/>energy level</b> | <b>S</b> | <b>T</b> |
|------------------------------|----------|----------|---------------------------------|----------|----------|
| 1                            | 2.72 eV  | 2.56 eV  | 1                               | 2.70 eV  | 2.32 eV  |
| 2                            |          | 2.58 eV  | 2                               |          | 2.55 eV  |
| 3                            |          | 2.69 eV  | 3                               |          | 2.56 eV  |
| 4                            |          | 2.90 eV  | 4                               |          | 2.63 eV  |
| 5                            |          | 2.92 eV  | 5                               |          | 2.69 eV  |
| 6                            |          | 2.99 eV  | 6                               |          | 2.75 eV  |
| 7                            |          |          | 7                               |          | 2.95 eV  |
| 8                            |          |          | 8                               |          | 2.98 eV  |
| 9                            |          |          | 9                               |          | 3.03 eV  |
